# Supplementary material for: QM/MM description of platinum–DNA interactions: comparison of binding and DNA distortion of five drugs
Source: Royal Society of Chemistry journal article supplement (doi:10.1039/c3ra23041d), 2013-01-01
Supplement: c3ra23041d.pdf [file c3ra23041d.pdf]

## Supporting Info for

### QM/MM description of platinum-DNA interactions: Comparison of binding and DNA distortion of five drugs

Konstantinos Gkionis, Shaun Mutter and James A. Platts

**Table S1:** Comparison of QM/MM and crystal structure of cisplatin-d(GpG)<sup>i</sup>

|                    | QM/MM        | crystal (sd)  |
|--------------------|--------------|---------------|
| Pt-NH <sub>3</sub> | 2.031, 2.033 | 2.052 (0.040) |
| Pt-N7              | 2.027, 2.024 | 1.992 (0.059) |
| N7A-Pt-N7B         | 90.85        | 88.3 (2.2)    |
| N1-Pt-N2           | 92.78        | 91.7 (1.01)   |
| guan/guan          | 86.54        | 81.2 (4.3)    |

**Table S2:** Selected geometrical data of platinum complexes (Å and °).<sup>a</sup>

|              | Pt-N1 | Pt-N2 | Pt-N7 <sub>A</sub> | Pt-N7 <sub>B</sub> | N1-Pt-N2 | N7 <sub>A</sub> -Pt-N7 <sub>B</sub> |
|--------------|-------|-------|--------------------|--------------------|----------|-------------------------------------|
| <b>1</b>     | 2.045 | 2.035 | 2.016              | 2.019              | 94.2     | 84.9                                |
|              | 2.016 | 2.035 | 2.000              | 2.025              | 89.5     | 88.0                                |
| <b>2</b>     | 2.035 | 2.025 | 2.023              | 2.026              | 83.4     | 84.2                                |
|              | 2.022 | 2.030 | 1.990              | 2.026              | 82.8     | 85.9                                |
| <b>3</b>     | 2.048 | 2.046 | 2.022              | 2.030              | 94.3     | 84.7                                |
|              | 2.050 | 2.054 | 2.006              | 2.039              | 101.3    | 85.1                                |
| <b>4 RRS</b> | 2.042 | 2.046 | 2.021              | 2.036              | 97.9     | 84.4                                |
|              | 2.037 | 2.046 | 1.997              | 2.045              | 90.5     | 85.4                                |
| <b>SSS</b>   | 2.043 | 2.045 | 2.021              | 2.023              | 95.3     | 85.3                                |
|              | 2.046 | 2.054 | 2.005              | 2.038              | 101.5    | 85.0                                |

<sup>a</sup> N1 and N2 refer to the carrier ligand, N7 to DNA; first line dimer, second line octamer.

<sup>i</sup> J.D. Orbell, L.G. Marzilli, T.J. Kistenmacher, J. Am. Chem. Soc. 103 (1981) 5126–5133.

**Table 3:** Base-pair geometries for platinated GC pairs (Å and °)<sup>a</sup>

|                          | Shear | Stretch | Stagger | Buckle | Propeller | Opening |
|--------------------------|-------|---------|---------|--------|-----------|---------|
| <b>1</b>                 | -0.58 | -0.28   | 0.17    | 16.3   | -20.7     | 1.3     |
|                          | -0.41 | -0.21   | -0.05   | 0.1    | 0.3       | 0.5     |
| <b>2</b>                 | -0.59 | -0.27   | 0.22    | 19.6   | -19.5     | 0.8     |
|                          | -0.45 | -0.22   | -0.04   | 0.3    | -1.0      | 0.8     |
| <b>3</b>                 | -0.72 | -0.30   | 0.23    | 19.6   | -16.7     | 0.9     |
|                          | -0.50 | -0.25   | -0.25   | 10.5   | 12.1      | -0.4    |
| <b>4 RRS</b>             | -0.63 | -0.26   | 0.22    | 20.5   | -16.3     | 1.1     |
|                          | -0.51 | -0.24   | -0.04   | 8.1    | 2.8       | 0.3     |
| <b>SSS</b>               | -0.61 | -0.23   | 0.32    | 25.1   | -17.1     | 1.0     |
|                          | -0.51 | -0.19   | -0.05   | 9.8    | 6.9       | 1.6     |
| <b>GG/CC<sup>a</sup></b> | -0.28 | -0.15   | 0.40    | 22.6   | -1.6      | -1.4    |
|                          | -0.15 | -0.18   | -0.02   | 3.9    | -11.1     | -0.8    |

<sup>a</sup> Values reported for 5'G—3'C (first line), 3'G—5'C (second); <sup>b</sup> Obtained from optimisation of GC pair using the same methods.
